# Supplementary material for: A Preclinical Study Combining the DNA Repair Inhibitor Dbait with Radiotherapy for the Treatment of Melanoma
Source: PubMed Central journal article supplement — Neoplasia. 2014 Oct 23;16(10):835–44. doi: 10.1016/j.neo.2014.08.008 (PMC4212251; doi:10.1016/j.neo.2014.08.008), 2014-10-23
Supplement: mmc1.pdf [file mmc1.pdf]

Figure S1

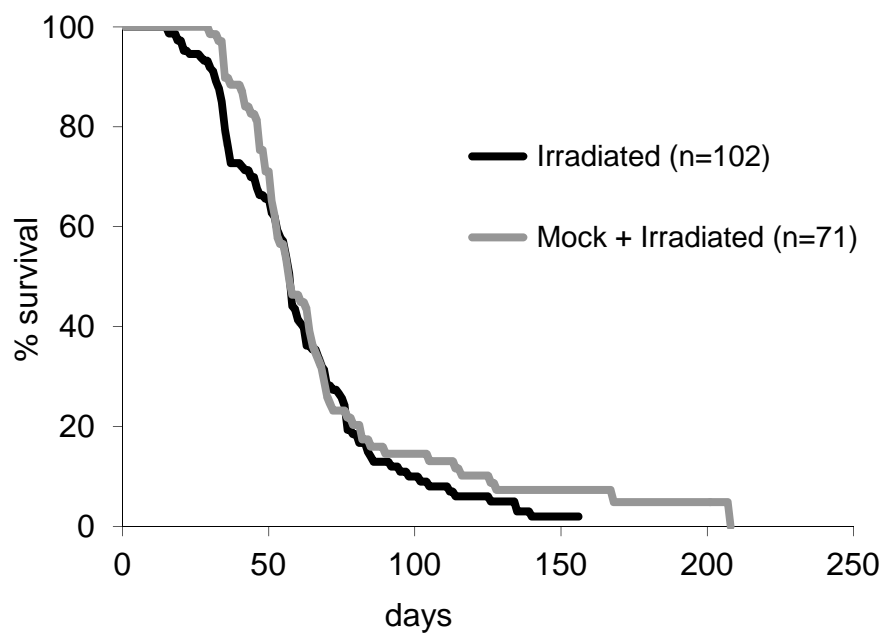

**Figure S1. Injections with vehicle alone (glucose 5%) do not affect RT efficacy.** Animals with SK28 human melanoma xenograft received 6 subcutaneous and intratumoral injections of 5% glucose solution (vehicle of Dbait) (grey) or no injections (black) and full protocol of radiotherapy for two weeks. Survival was monitored as described in material and methods. The data from nine independent experiments are presented. Statistical analysis ( $P < 0.3$ ;  $RR = 0.86$ ).

Figure S2

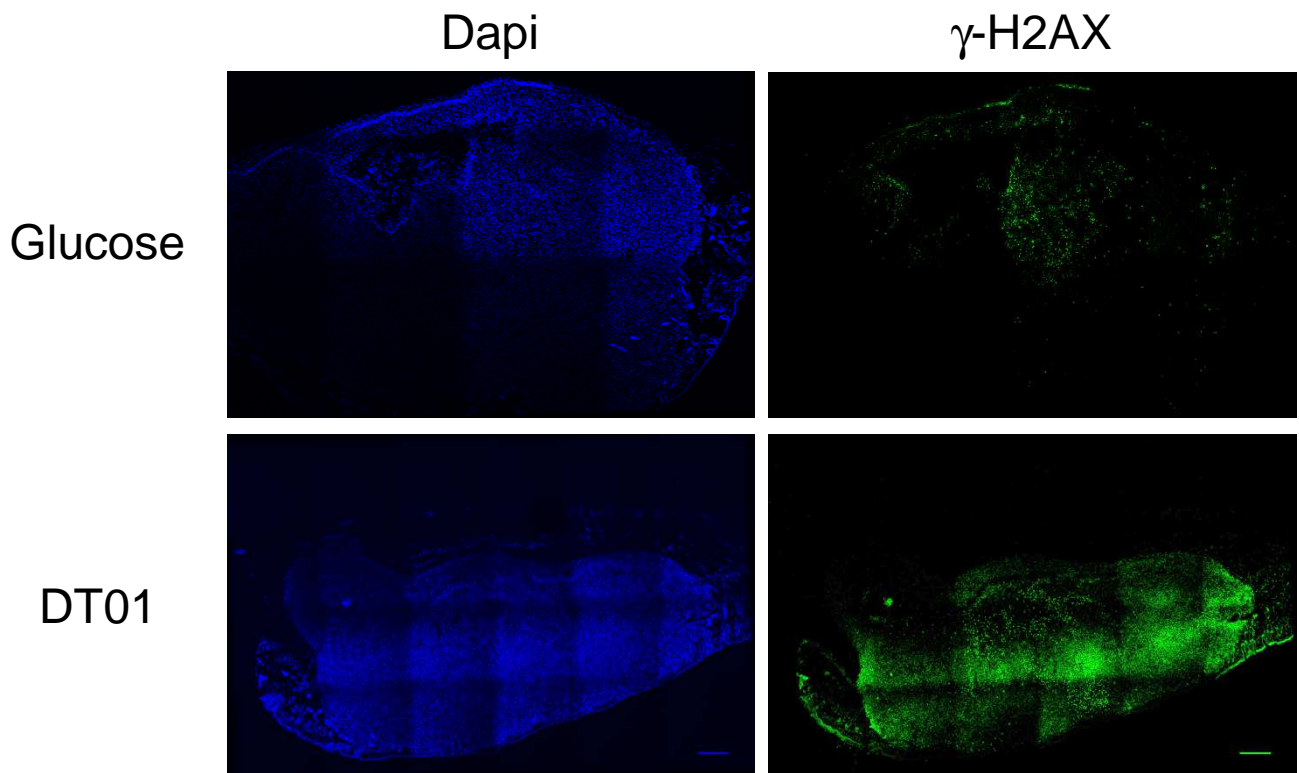

**Figure S2. Detection of DT01 activity (Dbait linked with cholesterol) in tumors.**  $\gamma$ -H2AX (representing DT01 activity) was monitored in LU1205 tumors 3 hours after subcutaneous and intratumoral injections of 2 mg of Dbait. Bar: 500 $\mu$ m.

Figure S3

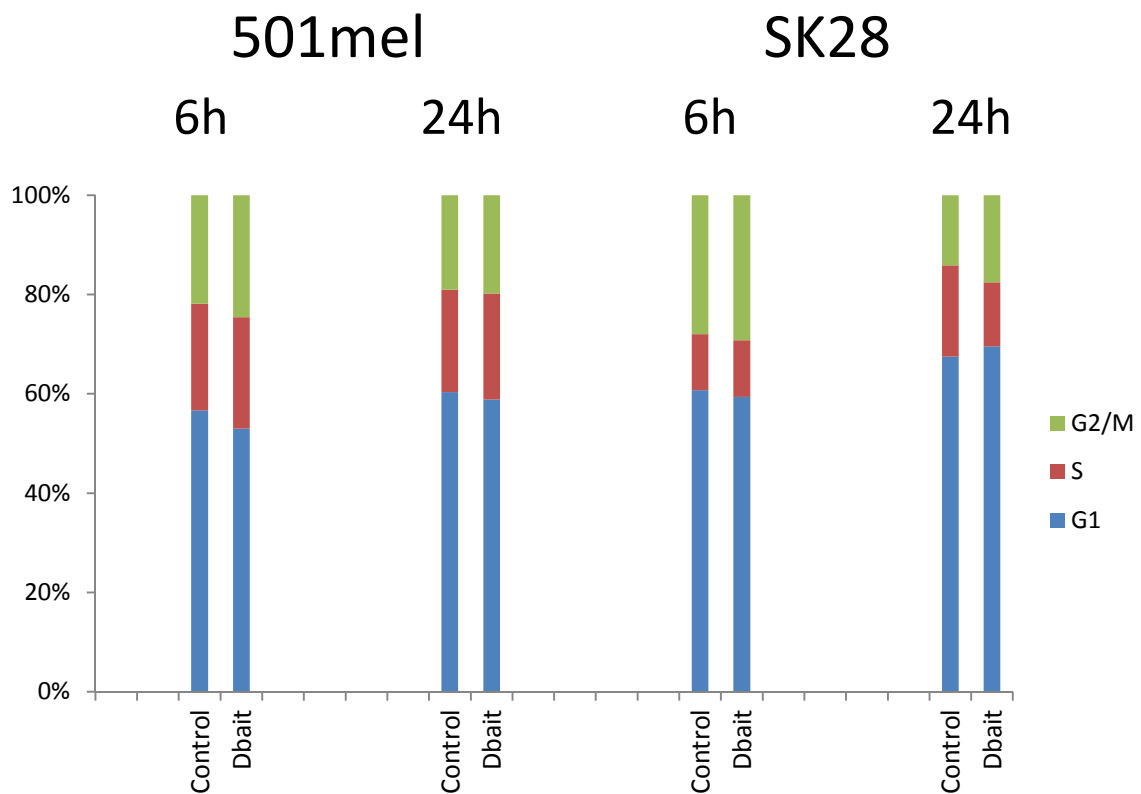

**Figure S3. Flow cytometric cell cycle analysis.**

Quantification of the 501mel and SK28 cells distribution in cell cycle 6 and 24 hours after Dbait treatment. DNA was labelled with propidium iodide.
